# Supplementary material for: Calorie Restriction Protects against Contrast-Induced Nephropathy via SIRT1/GPX4 Activation
Source: PubMed Central journal article supplement (PMC8548166; doi:10.1155/2021/2999296), 2021-10-19

# Figure S1

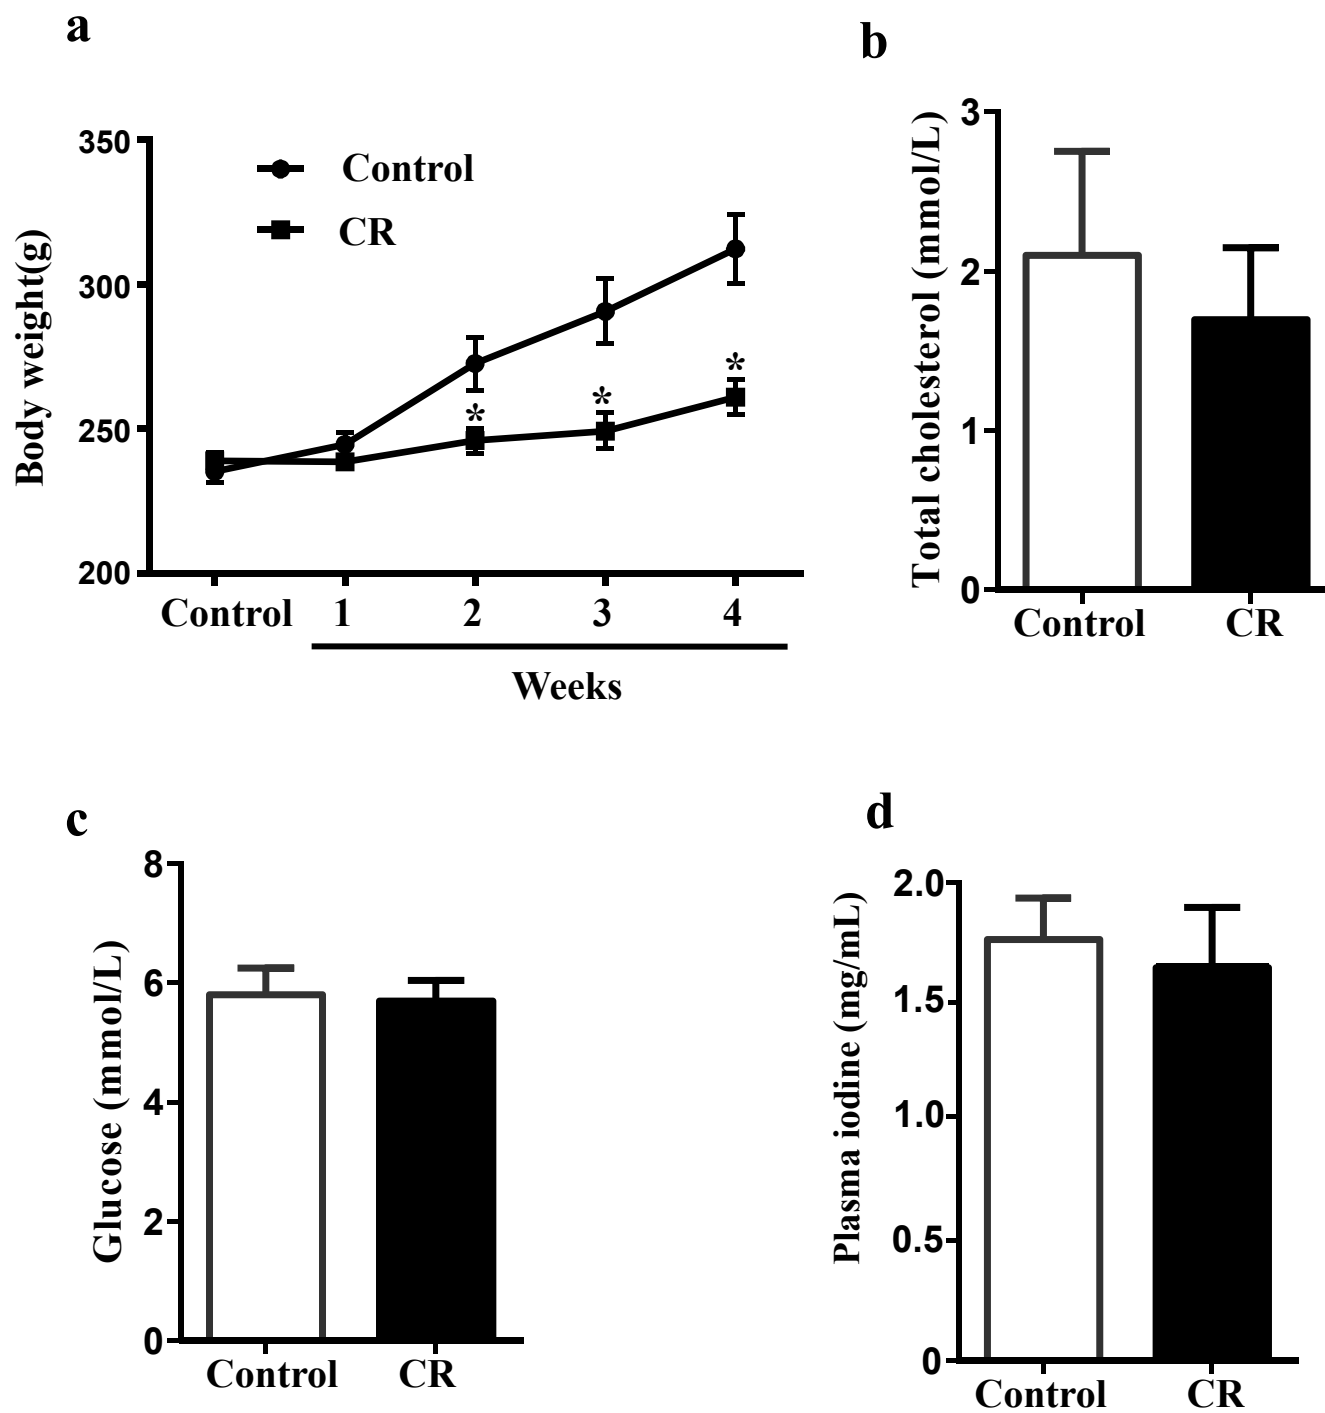

# Figure S2

**a**

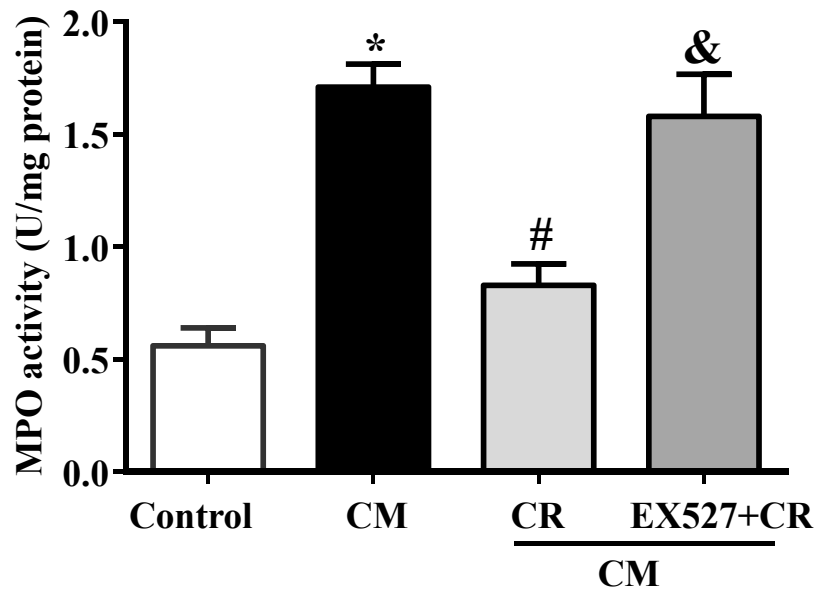

**b**

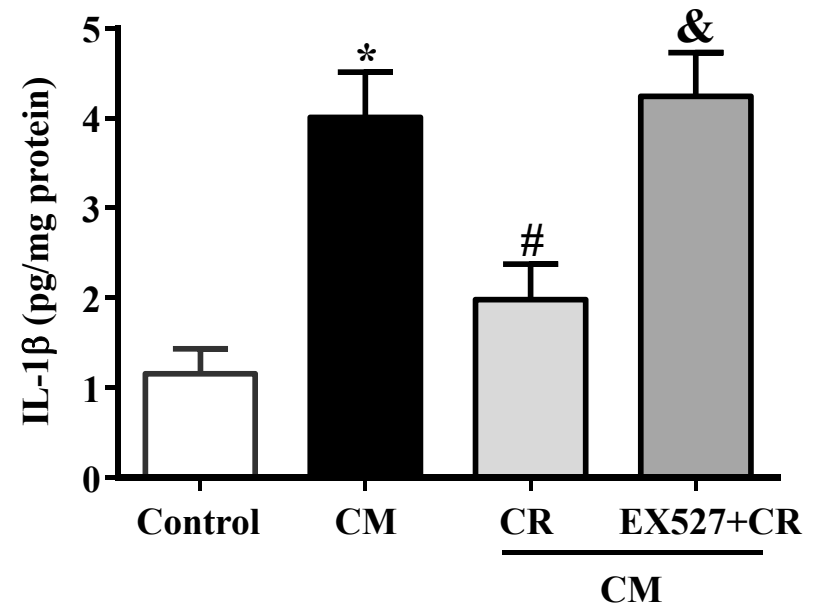

**c**

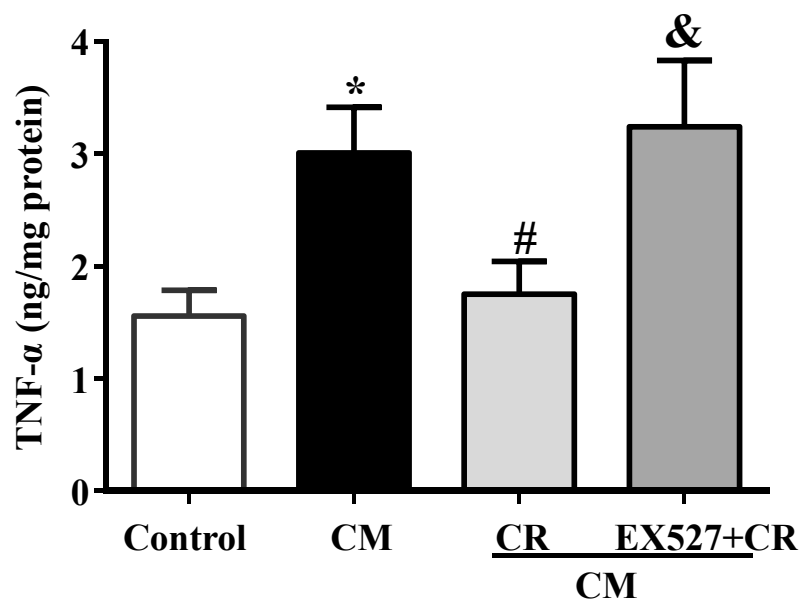

**Figure S3**

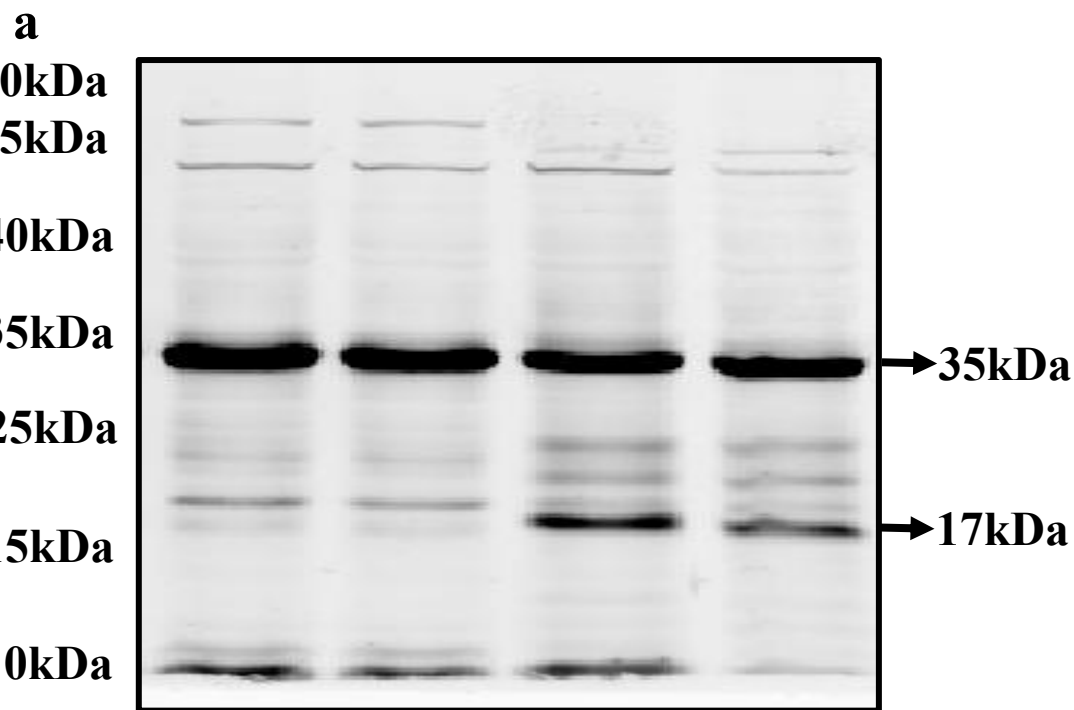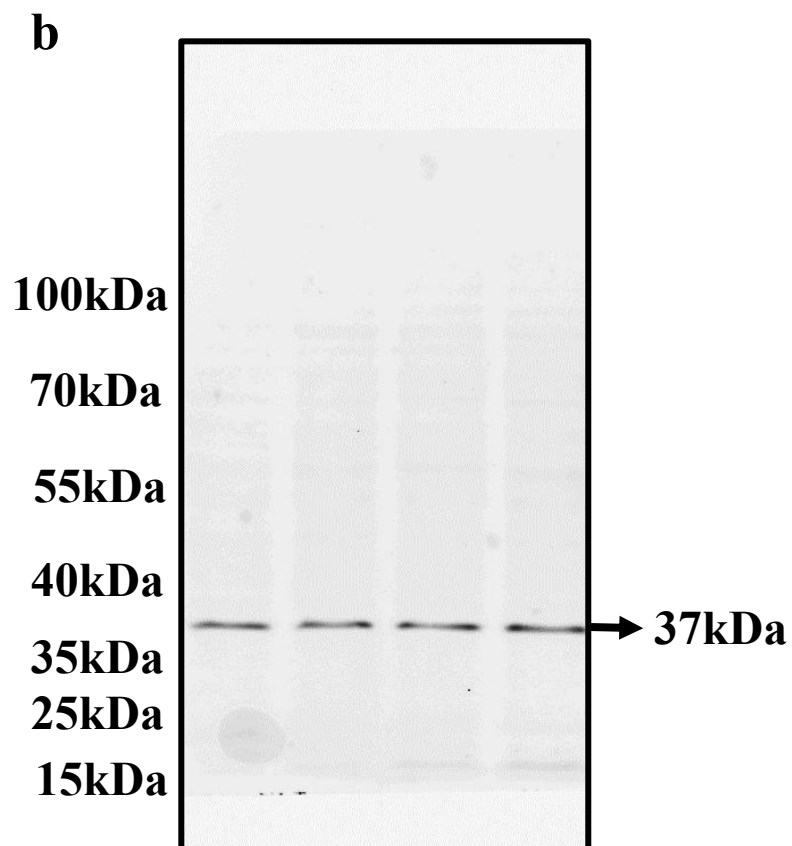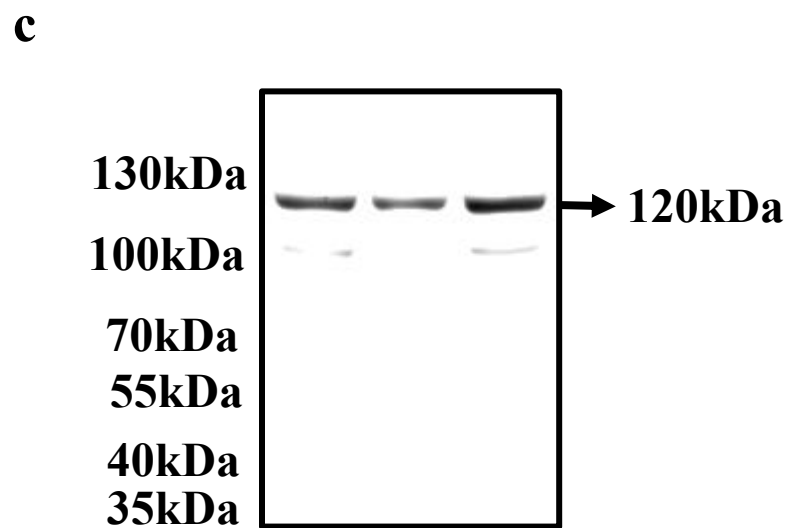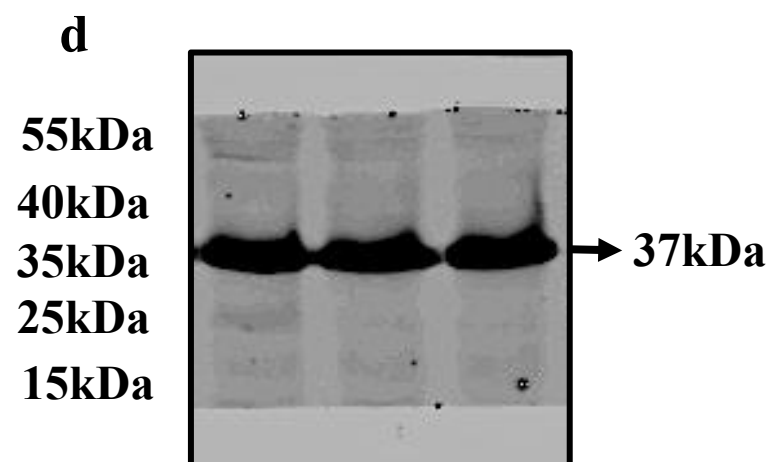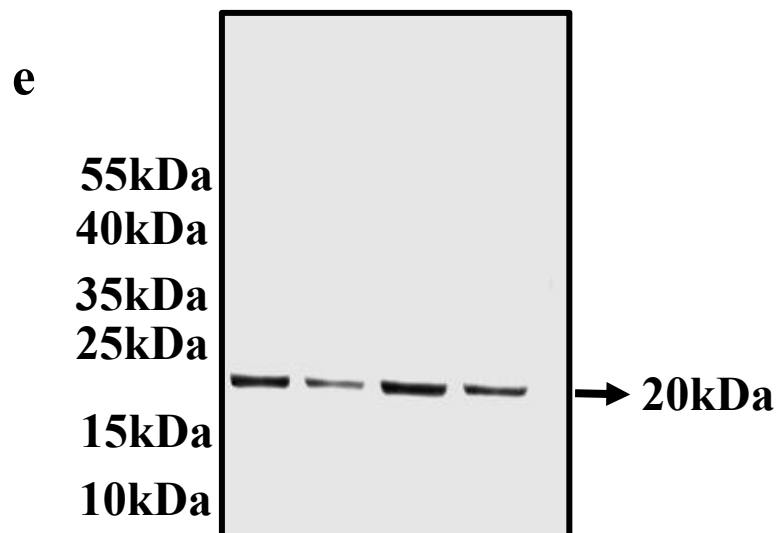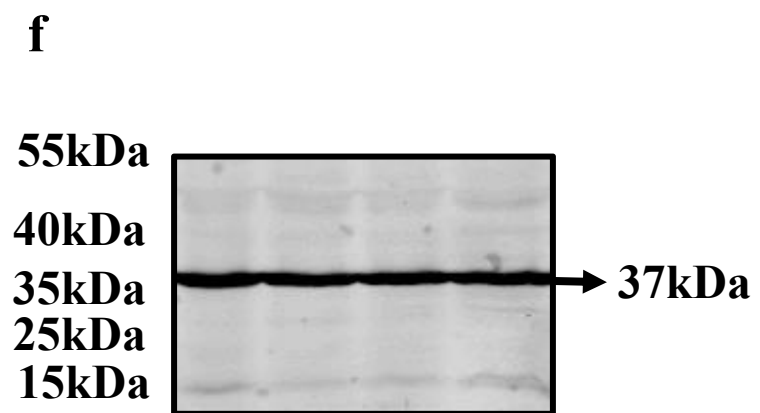

Supplement: 2999296.f1.pdf [file 2999296.f1.pdf]
